# Supplementary material for: Genetic Profiles and Risk Stratification in Adult De Novo Acute Myeloid Leukaemia in Relation to Age, Gender, and Ethnicity: A Study from Malaysia
Source: MDPI journal article supplement (doi:10.3390/ijms23010258), 2021-12-27
Supplement: s1 [file s1]

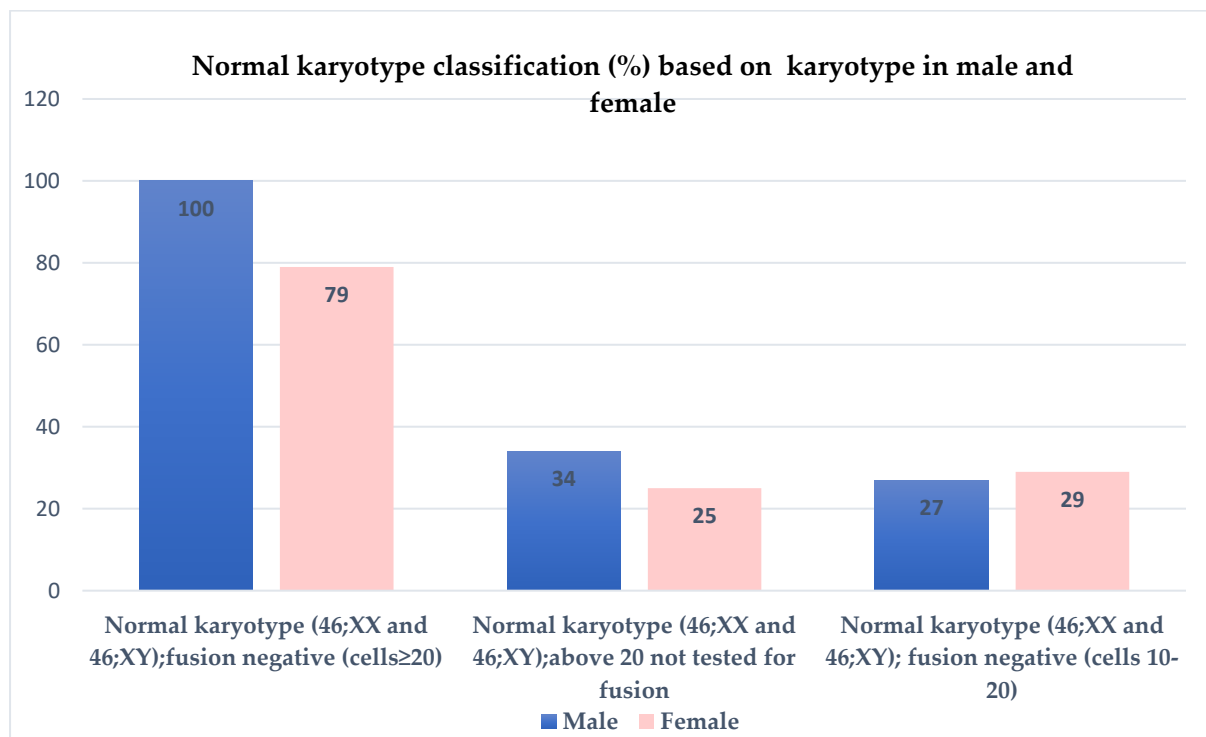

Figure S1. Assignment of AML-normal karyotype based on the metaphase chromosomes and QuanDx fusion findings

**Table S1. Summary of assignment of patients into groups based on cytogenetics and molecular genetics (QuanDx fusion kit findings)**

| Abnormality   | t(9;22) | t(15;17) | t(8;21) | inv(16) | MLL karyotypes | t(16;21) | NK <sup>a</sup> (>20 cells) | NK <sup>a</sup> (10-20 cells) | Failed/no results | del(5q) | del(7q) | del(9q) | (+) | (+) <sup>2</sup> | (+) <sup>2</sup> |
|---------------|---------|----------|---------|---------|----------------|----------|-----------------------------|-------------------------------|-------------------|---------|---------|---------|-----|------------------|------------------|
| BCR-ABL       | 3       | 1        | 0       | 0       | 0              | 0        | 0                           | 0                             | 0                 | 0       | 0       | 0       | 0   | 0                | 0                |
| PML-RARA      | 0       | 62       | 0       | 0       | 0              | 0        | 4                           | 1                             | 8                 | 0       | 0       | 0       | 0   | 0                | 0                |
| RUNX1-RUNX1T1 | 0       | 0        | 40      | 0       | 0              | 0        | 3                           | 0                             | 7                 | 0       | 0       | 0       | 0   | 0                | 0                |
| CBFB-MYH11A   | 0       | 0        | 0       | 16      | 0              | 0        | 7                           | 2                             | 3                 | 0       | 0       | 0       | 0   | 0                | 0                |
| MLL           | 0       | 0        | 0       | 0       | 6              | 0        | 1                           | 0                             | 0                 | 0       | 0       | 0       | 0   | 0                | 0                |
| FUS-ERG       | 0       | 0        | 0       | 0       | 0              | 1        | 0                           | 0                             | 0                 | 0       | 0       | 0       | 0   | 0                | 0                |

<sup>a</sup> NK: Normal karyotype

Table S2. Fusions and mutations detected in this AML cohort\*

|                 | FLT3-<br>TD+NPM1 <sup>wt</sup> /FLT3-<br>ITD-NPM1+/FLT3-<br>ITD+NPM1+<br><br>n=414 | PML-<br>RARA<br><br>n=341 | RUNXI-<br>RUNXITI<br><br>n=459 | CBFβ-<br>MYH Ii<br><br>n=432 | BCR-ABL<br><br>n=279 | MLL-<br>MLL T3<br><br>n=170 | MLL-<br>MLLT4<br><br>n=167 | MLL-<br>ELL<br><br>n=166 | FUS-ERG<br><br>n=167 |
|-----------------|------------------------------------------------------------------------------------|---------------------------|--------------------------------|------------------------------|----------------------|-----------------------------|----------------------------|--------------------------|----------------------|
| Detected        | 138(33)                                                                            | 75(22)                    | 50(11)                         | 28(6)                        | 4(1)                 | 3(2)                        | 1(1)                       | 1(1)                     | 1(1)                 |
| Not<br>Detected | 276(67)                                                                            | 266(78)                   | 409(89)                        | 404(94)                      | 275(99)              | 167(98)                     | 166(99)                    | 165(99)                  | 166(99)              |

\*Note that although 854 patients were recruited in this study, not all patients were tested for the mutations listed above. Refer to the n value below each mutation

**Table S3. Cytogenetic findings, NPM1 mutation, and FLT3-ITD distribution\***

|                          | Normal<br>karyotype | t(15;17) | t(8,21) | t(11q23) | inv(16) | del(5q/7q) | Misc<br>Deletion | Trisomi<br>8 | Misc<br>Trisomies | Misc<br>Translocation | Total    |
|--------------------------|---------------------|----------|---------|----------|---------|------------|------------------|--------------|-------------------|-----------------------|----------|
| <b>NPM1 mutation</b>     |                     |          |         |          |         |            |                  |              |                   |                       |          |
| Detected                 | 64(88)              | 2(3)     | 0(0)    | 0(0)     | 0(0)    | 0(0)       | 3(4)             | 0(0)         | 1(1)              | 3(4)                  | 73(100)  |
| Not Detected             | 124(45)             | 44(16)   | 25(9)   | 10(4)    | 13(5)   | 14(5)      | 9(3)             | 12(4)        | 8(3)              | 16(6)                 | 275(100) |
| Not tested               | 106(42)             | 40(16)   | 26(10)  | 5(2)     | 17(7)   | 18(7)      | 16(6)            | 7(3)         | 5(2)              | 13(5)                 | 253(100) |
| Total                    | 294(49)             | 86(14)   | 51(8)   | 15(2)    | 30(5)   | 32(5)      | 28(5)            | 19(3)        | 14(2)             | 32(5)                 | 601(100) |
| <b>FLT3-ITD mutation</b> |                     |          |         |          |         |            |                  |              |                   |                       |          |
| Detected                 | 42(61)              | 12(17)   | 3(4)    | 0(0)     | 0(0)    | 1(1)       | 1(1)             | 6(9)         | 0(0)              | 4(6)                  | 69(100)  |
| Not Detected             | 151(48)             | 45(14)   | 31(10)  | 10(3)    | 16(5)   | 17(5)      | 14(4)            | 6(2)         | 9(3)              | 18(6)                 | 317(100) |
| Not tested               | 101(47)             | 29(13)   | 17(8)   | 5(2)     | 14(7)   | 14(7)      | 13(6)            | 7(3)         | 5(2)              | 10(5)                 | 215(100) |
| Total                    | 294(49)             | 86(14)   | 51(8)   | 15(2)    | 30(5)   | 32(5)      | 28(5)            | 19(3)        | 14(2)             | 32(5)                 | 601(100) |

\*601 cases with successful karyotype data represented in Table S3. Excluded data includes cases with failed karyotypes and no karyotype testing done (253/854 cases).
